1     **A truncated form of HpARI stabilises IL-33, amplifying responses to**  
2                                    **the cytokine.**

3     **Caroline Chauché<sup>1,2</sup>, Francesco Vacca<sup>1,3</sup>, Shin Li Chia<sup>1</sup>, Josh Richards<sup>1</sup>, William F Gregory<sup>1</sup>,**  
4     **Adefunke Ogunkanbi<sup>5</sup>, Martin Wear<sup>4</sup>, Henry J McSorley<sup>1,5\*</sup>**

5     <sup>1</sup>Centre for Inflammation Research, University of Edinburgh, Edinburgh, United Kingdom.

6     <sup>2</sup>Wellcome Centre for Integrative Parasitology, Institute of Infection, Immunity and Inflammation,  
7     University of Glasgow, Glasgow, United Kingdom.

8     <sup>3</sup>Malaghan Institute of Medical Research, Wellington, New Zealand.

9     <sup>4</sup>The Edinburgh Protein Production Facility (EPPF), Wellcome Trust Centre for Cell Biology  
10    (WTCCB), University of Edinburgh, Edinburgh, United Kingdom

11    <sup>5</sup> Division of Cell Signalling and Immunology, School of Life Sciences, University of Dundee,  
12    Dundee, United Kingdom.

13    **\* Correspondence:**

14    Dr Henry J McSorley

15    hmcSorley001@dundee.ac.uk

16    **Keywords:** *Heligmosomoides polygyrus*, IL-33, allergy, cytokine, ILC2.

17

18 **1 Abstract**

19 The murine intestinal nematode *Heligmosomoides polygyrus* releases the *H. polygyrus* Alarmin  
20 Release Inhibitor (HpARI) - a protein which binds to IL-33 and to DNA, effectively tethering the  
21 cytokine in the nucleus of necrotic cells. Previous work showed that a non-natural truncation  
22 consisting of the first 2 domains of HpARI (HpARI\_CCP1/2) retains binding to both DNA and IL-  
23 33, and inhibited IL-33 release *in vivo*. Here, we show that the affinity of HpARI\_CCP1/2 for IL-33  
24 is significantly lower than that of the full-length protein, and that HpARI\_CCP1/2 lacks the ability to  
25 prevent interaction of IL-33 with its receptor. When HpARI\_CCP1/2 was applied *in vivo* it potently  
26 amplified IL-33-dependent immune responses to *Alternaria alternata* allergen, *Nippostrongylus*  
27 *brasiliensis* infection and recombinant IL-33 injection. Mechanistically, we found that  
28 HpARI\_CCP1/2 is able to bind to and stabilise IL-33, preventing its degradation and maintaining the  
29 cytokine in its active form. This study highlights the importance of IL-33 inactivation, the potential  
30 for IL-33 stabilisation *in vivo*, and describes a new tool for IL-33 research.

31

32

## 33 2 Introduction

34 *Heligmosomoides polygyrus* is a parasitic nematode that infects the intestines of mice. It has a  
35 faecal/oral lifecycle, with infective L3 larvae being ingested, and then rapidly penetrating the  
36 epithelium of the proximal duodenum. There, the larvae develop to L4 stage and emerge as adults  
37 into the intestinal lumen at around day 10 of infection (Johnston et al., 2015; Reynolds, Filbey, &  
38 Maizels, 2012). The transit of the parasite through the intestinal wall is likely to cause epithelial  
39 damage and cell death, with resulting release of alarmins such as IL-33 (from stromal cells or mast  
40 cells (Shimokawa et al., 2017)), in turn inducing an anti-parasite type 2 immune response (Harris &  
41 Loke, 2017). In order to negate this response, and allow persistence of the parasite in the host, *H.*  
42 *polygyrus* secretes multiple immunomodulatory factors, including Hp-TGM, a protein mimic of host  
43 TGF- $\beta$  (Johnston et al., 2017), and microRNA-containing extracellular vesicles (Buck et al., 2014)  
44 which modulate transcription of multiple host genes, including suppression of Suppression of  
45 Tumorigenicity 2 (ST2), the IL-33 receptor. We previously showed that the parasite also secretes the  
46 *H. polygyrus* Alarmin Release Inhibitor (HpARI), which blocks IL-33 responses (Osbourn et al.,  
47 2017).

48 IL-33 is an alarmin cytokine constitutively produced by epithelial cells. It is stored preformed in the  
49 nucleus and released on necrotic cell death, due to mechanical, protease-mediated or chemical  
50 damage to the epithelium (Johansson & McSorley, 2019). On necrotic cell death, proteases from the  
51 cell cytoplasm, or those secreted by recruited mast cells, neutrophils or those in allergens can then  
52 cleave the cytokine between the N-terminus chromatin-binding domain and the C-terminus receptor  
53 binding domain, potently increasing the activity of the cytokine (Cayrol et al., 2018; Lefrancais et al.,  
54 2012; Scott et al., 2018). The IL-33 receptor-binding domain contains four free cysteine residues,  
55 which upon release from the reducing nuclear environment into the oxidising extracellular  
56 environment rapidly form disulphide bonds, changing the cytokine's conformation, rendering it  
57 unable to bind to its receptor and effectively inactivating it (Cohen et al., 2015). Proteases can also  
58 further degrade IL-33 to smaller, inactive forms (Scott et al., 2018). Thus, the active form of IL-33  
59 has only a very short half-life, and by 1 hour after release the vast majority of IL-33 is inactive or  
60 degraded.

61 HpARI binds to the active reduced form of IL-33 and to genomic DNA. This dual binding tethers IL-  
62 33 within the nucleus of necrotic cells, preventing its release, and inhibiting interaction of IL-33 with  
63 ST2. The HpARI protein consists of 3 Complement Control Protein domains (CCP1-3), and our  
64 previous data showed that HpARI binds IL-33 through the CCP2 domain, while DNA-binding was  
65 mediated by the CCP1 domain (Osbourn et al., 2017). Here, we further characterise the functions of  
66 the CCP domains of HpARI, finding that CCP3 stabilises the interaction between HpARI and IL-33,  
67 increasing its affinity and being required for blockade of IL-33-ST2 interactions. Furthermore, we  
68 show that HpARI\_CCP1/2 (the HpARI truncation lacking CCP3) is able to stabilise IL-33, increasing  
69 its half-life and amplifying its effects.

70

71

## 72 3 Materials and Methods:

### 73 Protein expression and purification:

74 Constructs encoding HpARI, HpARI\_CCP1/2 and HpARI\_CCP2/3 (all with C-terminus myc and 6-  
75 His tags) were cloned into the pSecTAG2A expression vector as previously described (Osbourn et  
76 al., 2017). Purified plasmids were transfected into Expi293F™ cells, and supernatants collected 5  
77 days later. Expi293F™ cells were maintained, and transfections carried out using the Expi293  
78 Expression System according to manufacturer's instructions (ThermoFisher Scientific). Expressed  
79 protein in supernatants were purified over a HisTrap excel column (GE Healthcare) and eluted in 500  
80 mM imidazole. Eluted protein was then dialysed to PBS, and repurified on a HiTRAP chelating HP  
81 column (GE Healthcare) charged with 0.1 M NiSO<sub>4</sub>. Elution was performed using an imidazole  
82 gradient and fractions positive for the protein of interest were pooled, dialysed to PBS and filter-  
83 sterilised. Protein concentration was measured at A280 nM (Nanodrop, ThermoFisher Scientific),  
84 using calculated extinction coefficient.

85

### 86 Surface Plasmon Resonance (SPR)

87 SPR measurements were performed using a BIAcore T200 instrument (GE Healthcare). Ni<sup>2+</sup>-  
88 nitrilotriacetic acid (NTA) sensor chips, 1-ethyl-3-(3-diaminopropyl) carbodiimide hydrochloride  
89 (EDC), *N*-hydroxysuccinimide (NHS) and ethanolamine (H<sub>2</sub>N(CH<sub>2</sub>)<sub>2</sub>OH) were purchased from GE  
90 Healthcare. HpARI, HpARI\_CCP1/2 or HpARI\_CCP2/3 were immobilized and covalently stabilised  
91 on an NTA sensor chip essentially as described (Wear & Walkinshaw, 2006) with the following  
92 modifications: following Ni<sup>2+</sup> priming (30 sec injection of 500 μM NiCl<sub>2</sub> at 5 μl·min<sup>-1</sup>), dextran  
93 surface carboxylate groups were minimally activated by an injection of 0.2 M EDC; 50 mM NHS at  
94 5 μl·min<sup>-1</sup> for 240 sec. Respective proteins (at concentrations between 10 and 400 nM), in 10 mM  
95 NaH<sub>2</sub>PO<sub>4</sub>, pH 7.5; 150 mM NaCl; 50 μM EDTA; 0.05% surfactant P20, were captured *via* the hexa-  
96 his tag and simultaneously covalently stabilised to 400 RU, by varying the contact time. Immediately  
97 following the capture/stabilisation a single 15 sec injection of 350 mM EDTA and 50 mM Imidazole  
98 in 10 mM NaH<sub>2</sub>PO<sub>4</sub>, pH 7.5; 150 mM NaCl; 50 mM EDTA; 0.05% surfactant P20, at 30 μl·min<sup>-1</sup>,  
99 was used to remove non-covalently bound protein, followed by a 180 sec injection of 1 M  
100 H<sub>2</sub>N(CH<sub>2</sub>)<sub>2</sub>OH, pH 8.5 at 5 μl·min<sup>-1</sup>. Prior to any experiments, the surface was further conditioned  
101 with a 600 sec wash with 10 mM NaH<sub>2</sub>PO<sub>4</sub>, pH 7.5; 150 mM NaCl; 50 μM EDTA; 0.05% surfactant  
102 P20 at 100 μl·min<sup>-1</sup>.

103 SPR single-cycle kinetic titration binding experiments were performed at 25°C. Three-fold dilution  
104 series of mL-33 (2.47 nM to 200 nM), were injected over the sensor surface, in 10 mM NaH<sub>2</sub>PO<sub>4</sub>,  
105 pH 7.5; 150 mM NaCl; 50 μM EDTA; 0.05% surfactant P20, at 30 ml·min<sup>-1</sup> for 30 s followed by a  
106 final 600 s dissociation phase. The on- (*k*<sub>+</sub>) and off-rate (*k*<sub>-</sub>) constants and the equilibrium  
107 dissociation constants were calculated from the double referenced sensorgrams by global fitting of a  
108 1:1 binding model, with mass transport considerations, using analysis software (v2.02) provided with  
109 the Biacore T200 instrument.

110

### 111 Immunoprecipitation

112 Protein G dynabeads (ThermoFisher Scientific) were coated with 1 µg mouse ST2-Fc (Biolegend),  
113 and washed on a DynaMag-2 magnet with PBS 0.02% Tween 20. 100 ng recombinant murine IL-33  
114 (Biolegend) was then mixed with 1 µg HpARI, HpARI\_CCP1/2 or HpARI\_CCP2/3, and incubated at  
115 room temperature for 15 min, prior to adding to ST2-Fc-coated protein G dynabeads. Beads were  
116 washed and bound IL-33 eluted with 50 mM glycine pH2.8, then ran on 4-12% SDS-PAGE gels  
117 (ThermoFisher Scientific) under reducing conditions, and transferred to nitrocellulose membranes for  
118 western blotting, probing with anti-IL-33 goat polyclonal antibody (R&D Systems AF3626), rabbit  
119 anti-goat IgG-HRP secondary antibody (ThermoFisher Scientific) and detected using WesternSure  
120 Premium reagent (Licor).

121

## 122 **Animals**

123 BALB/cAnNCrI and C57BL/6JCrI mice were purchased from Charles River, UK. Heterozygous IL-  
124 13eGFP<sup>+/GFP</sup> mice (Neill et al., 2010) were bred in-house. All mice were accommodated and  
125 procedures performed under UK Home Office licenses with institutional oversight performed by  
126 qualified veterinarians.

127

## 128 **Alternaria models**

129 *Alternaria* allergen was used *in vivo* as previously described (McSorley, Blair, Smith, McKenzie, &  
130 Maizels, 2014; Osbourn et al., 2017). *Alternaria* allergen (10 µg), OVA (20 µg), HpARI (10 µg) and  
131 HpARI\_CCP1/2 (10 µg) were intranasally administered to BALB/c mice. Where indicated, the  
132 OVA-specific response was recalled by daily intranasal administration of 20 µg OVA protein on days  
133 14, 15 and 16. Tissues were harvested 24 h or 17 days after initial *Alternaria* allergen administration.  
134 Lungs were flushed with 4 washes of 0.5 ml ice-cold PBS to collect bronchoalveolar lavage cells,  
135 followed by lung dissection for single cell preparation.

136

## 137 ***Nippostrongylus brasiliensis* infection**

138 The life cycle of *N. brasiliensis* was maintained in Sprague-Dawley rats as previously described  
139 (Lawrence, Gray, Osborne, & Maizels, 1996), and infective L3 larvae were prepared from 1-3 week  
140 rat fecal cultures. BALB/c mice were subcutaneously infected with 400 L3 *N. brasiliensis* larvae, and  
141 culled 3 or 6 days later.

142

## 143 **Intraperitoneal IL-33 treatment**

144 Recombinant murine IL-33 (Biolegend) was injected intraperitoneally to C57BL/6 mice (100  
145 ng/mouse). Mice were culled 3 hours later and peritoneal lavage cells collected in 3 washes of 3 ml  
146 ice-cold RPMI.

147

## 148 **Flow cytometry**

149 Cells were stained with Fixable Blue Live/Dead stain (ThermoFisher Scientific), then blocked with  
150 anti-mouse CD16/32 antibody and surface stained with CD3 (FITC, clone 145-2C11), CD5 (FITC,  
151 clone 53-7.3), CD11b (FITC, M1/70), CD19 (FITC, clone 6D5), GR1 (FITC, clone RB6-8C5), CD45  
152 (AF700, clone 30-F11), ICOS (PCP, clone 15F9), CD4 (PE-Dazzle, cloneRM4.5), CD11c (AF647,  
153 clone N418), Ly6G (PerCP, clone 1A8), CD25 (BV650, clone PC61) (Biolegend), CD49b (FITC,  
154 clone DX5), ST2 (APC, clone RMST2-2) (ThermoFisher Scientific), Siglec-F (PE, clone ES22-  
155 10D8) (Miltenyi). The lineage stain consisted of CD3, CD5, CD11b, CD19, CD49b and GR1, all on  
156 FITC. Samples were acquired on an LSR Fortessa (BD Biosciences) and analysed using FlowJo 10  
157 (Treestar).

158

## 159 **CMT-64 cell line**

160 CMT-64 cells (ECACC 10032301) were maintained by serial passage in “complete” RPMI (RPMI  
161 1640 medium containing 10% fetal bovine serum, 2 mM L-glutamine, 100 U/ml Penicillin and 100  
162 µg/ml Streptomycin (ThermoFisher Scientific)) at 37°C, 5% CO<sub>2</sub>. Cells were seeded into 24- or 96-  
163 well plates for Triton-X100 or freeze-thaw treatment respectively. Cells were grown to 100%  
164 confluency prior to 2 washes with PBS. For Triton-X100 treatment, cells were then washed into  
165 RPMI 1640 containing 0.1% BSA with or without 0.1% Triton-X100, and incubated at 37°C as  
166 indicated, prior to collection of supernatants and measurement of IL-33 by ELISA and western blot.  
167 For freeze-thaw assays, cells were then washed into complete RPMI containing 10 µg/ml of HpARI  
168 or HpARI\_CCP1/2, frozen on dry ice for at least 1 h, then thawed and incubated at 37°C as indicated,  
169 prior to collection of supernatants and application to bone marrow cell cultures.

170

## 171 **Cytokine measurement**

172 ELISAs were carried out to manufacturer’s instructions for IL-5, IL-13 (Ready-SET-go,  
173 ThermoFisher Scientific) and IL-33 (Duoset, Biotechne). IL-33 was also measured in CMT-64  
174 supernatants by western blot – supernatants were ran on 4-12% NuPAGE gels (ThermoFisher  
175 Scientific) under reducing conditions, before transferring to nitrocellulose membrane and probing  
176 with goat anti-mIL-33 (Biotechne), and rabbit anti-goat IgG HRP secondary antibody (Thermo  
177 Fisher), and detected using WesternSure Premium reagent (Licor).

178

## 179 **Statistical Analysis**

180 All data was analysed using Prism (Graphpad Software Inc.). One-way ANOVA with Dunnet’s  
181 multiple comparisons post-test was used to compare multiple independent groups, while two-way  
182 ANOVA and Tukey’s multiple comparison’s post-test was used to compare multiple timepoints or  
183 concentrations between independent groups. Where necessary, data was log-transformed to give a  
184 normal distribution and to equalise variances. \*\*\*\* = p<0.0001, \*\*\* = p<0.001, \*\* = p<0.01, \* =  
185 p<0.05, N.S. = Not Significant (p>0.05).

186

## 187 4 Results

188 *HpARI CCP2 binds IL-33, while HpARI CCP3 is required to block IL-33-ST2 interaction.*

189 Constructs encoding full-length HpARI, or truncations lacking CCP3 (HpARI\_CCP1/2), or lacking  
190 CCP1 (HpARI\_CCP2/3) were expressed in Expi293F<sup>TM</sup> mammalian cells, and purified on 6-His  
191 tags. These constructs were then tested for binding to IL-33 in surface plasmon resonance  
192 experiments, showing that the affinity for IL-33 of full-length HpARI and HpARI\_CCP2/3 were  
193 similar ( $K_d$  of 1.1 +/- 0.44 nM and 1.4 +/- 0.14 nM respectively), while HpARI\_CCP1/2 had  
194 approximately a 10-fold lower affinity for the cytokine ( $K_d = 9.8 +/- 6.7$  nM). This difference in  
195 affinity was largely due to an approximately 20-fold faster off-rate for HpARI\_CCP1/2 ( $K_{off}$  of 30  
196  $\times 10^{-4}$  s<sup>-1</sup> versus 1.5  $\times 10^{-4}$  s<sup>-1</sup> for HpARI) (Figure 1A).

197 The CCP3 domain also appears important for preventing IL-33-ST2 interactions. While full-length  
198 HpARI and HpARI\_CCP2/3 were able to prevent IL-33 immunoprecipitation by ST2-Fc,  
199 HpARI\_CCP1/2 could not (Figure 1B).

200

201 *HpARI\_CCP1/2 increases responses to IL-33.*

202 We previously showed that HpARI\_CCP1/2 was capable of suppressing the release of IL-33 in vivo,  
203 15 minutes after *Alternaria alternata* administration (Osbourn et al., 2017). To assess whether  
204 HpARI\_CCP1/2 could replicate the inhibition of IL-33-dependent responses seen with full-length  
205 HpARI, we administered HpARI or HpARI\_CCP1/2 together with *Alternaria* allergen and OVA  
206 protein and assessed type 2 immune responses after OVA challenge 2 weeks later. While HpARI  
207 suppressed allergic reactivity in this model (as shown previously (Osbourn et al., 2017)),  
208 HpARI\_CCP1/2 had the opposite effect, increasing BAL and lung eosinophil numbers and lung ILC2  
209 numbers (Figure 2A and Supplementary Figure 2).

210 Similarly, when the innate *Alternaria*-induced immune response was assessed 24 h after initial  
211 administration of the allergen to naïve mice, we found that although HpARI\_CCP1/2 did not change  
212 the eosinophil response compared to *Alternaria* alone, HpARI\_CCP1/2 increased BAL neutrophil  
213 numbers. At this timepoint, no ILC2 proliferation has yet occurred (as previously described (Doherty  
214 et al., 2012)), so total lung ILC2 cell numbers were similar in all groups (data not shown), however  
215 allergen-activated ILC2s showed strong upregulation of CD25 expression (as described previously  
216 during activation of ILC2s in this model (Bartemes et al., 2012)), which was further increased by  
217 HpARI\_CCP1/2 (Figure 2B).

218 To exclude the possibility that HpARI\_CCP1/2 is interfering with the *Alternaria* allergen directly,  
219 exacerbating the response to it, we used a second model of IL-33-dependent responses (Filbey et al.,  
220 2019; Hung et al., 2013; Wills-Karp et al., 2012), infecting mice with *Nippostrongylus brasiliensis*  
221 and administering HpARI or HpARI\_CCP1/2 to the lungs during the first 3 days of infection. During  
222 *N. brasiliensis* infection, larvae migrate through the lung at days 1-4, and enter as adults into the gut  
223 at days 4-10 post-infection (Filbey et al., 2019). Mice were therefore culled at days 3 and 6 post-  
224 infection, at the peak of the lung and gut stages, and the type 2 immune response in the lung was  
225 assessed. Again, HpARI suppressed type 2 immune responses (as shown previously (Osbourn et al.,  
226 2017)), while HpARI\_CCP1/2 increased BAL eosinophilia, IL-5 and IL-13 production (Figure 2C).

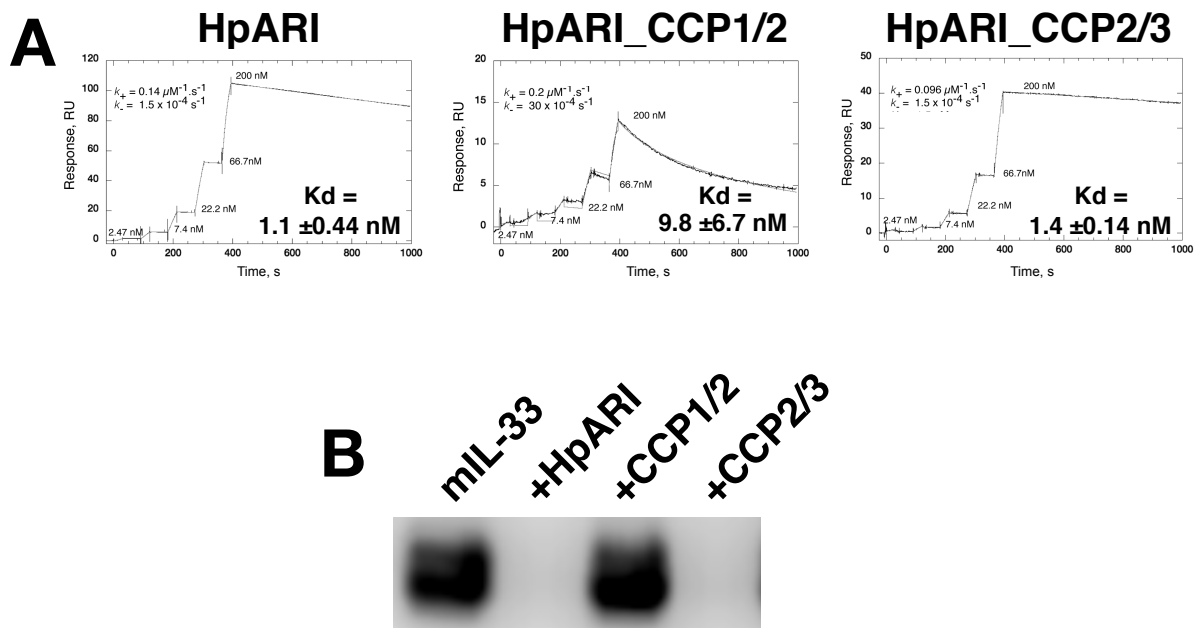

**Figure 1:**

**(A)** Surface plasmon resonance measurements of IL-33 binding to chip-bound HpARI, HpARI\_CCP1/2 and HpARI\_CCP2/3.  
**(B)** ST2-Fc was bound to protein G-coated magnetic beads and used to immunoprecipitate murine IL-33 (mIL-33). IL-33 western blot of eluted material shown. Image representative of two independent experiments.



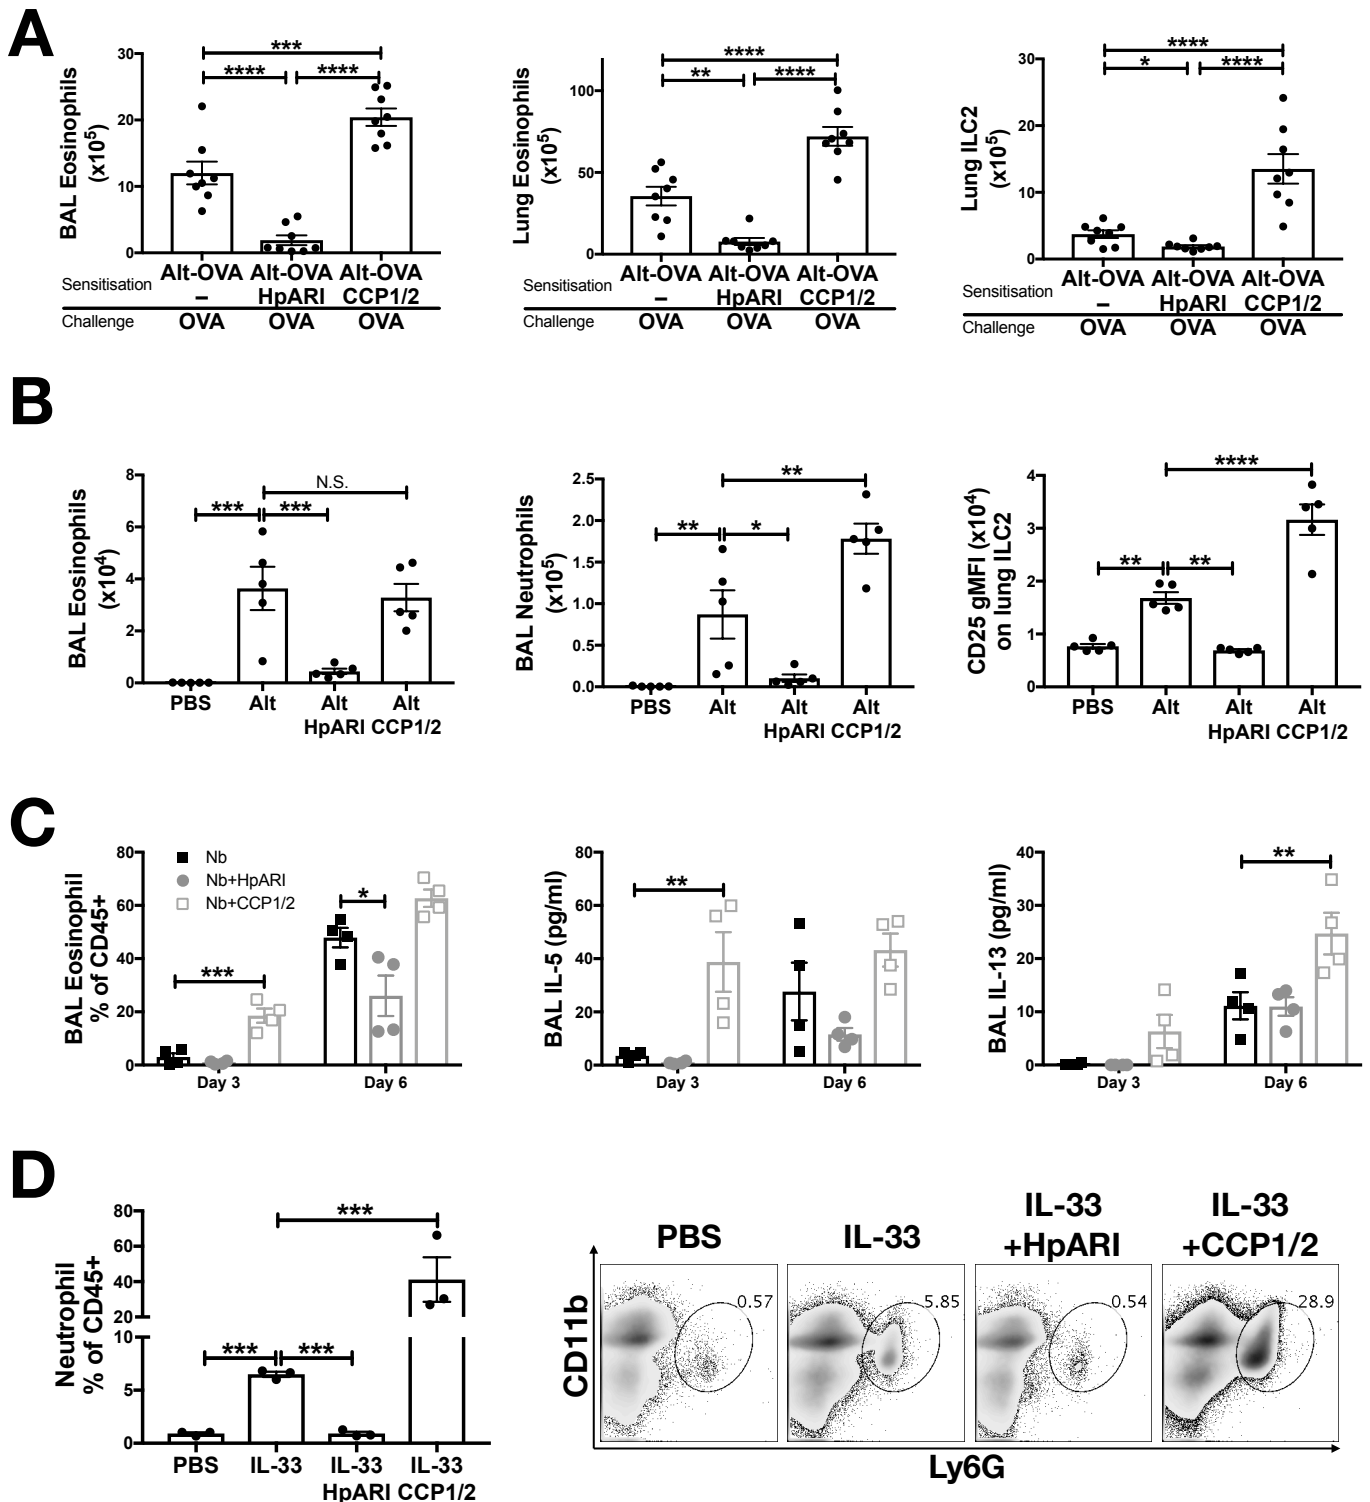

**Figure 2:**

- (A) HpARI or HpARI<sub>CCP1/2</sub> (CCP1/2) were coadministered with *Alternaria* and OVA by the intranasal route, then the OVA-specific response recalled 2 weeks later. BAL and lung eosinophil (Siglec<sup>+</sup>CD11c-CD45<sup>+</sup>) and ILC2 (ICOS+lineage<sup>-</sup>CD45<sup>+</sup>) cell numbers shown. Data pooled from 2 repeat experiments.
- (B) HpARI<sub>CCP1/2</sub> (CCP1/2) was coadministered with *Alternaria* allergen by the intranasal route. After 24 h, BAL eosinophil (Siglec<sup>+</sup>CD11c-CD45<sup>+</sup>) and neutrophil (Ly6G+CD11b+Siglec<sup>+</sup>CD11c-CD45<sup>+</sup>) numbers, and lung ILC2 CD25 geometric mean fluorescent intensity were assessed by flow cytometry. Data representative of 2 repeat experiments.
- (C) HpARI or HpARI<sub>CCP1/2</sub> were intranasally administered on days 0, 1 and 2 after infection with *Nippostrongylus brasiliensis*. BAL eosinophil (Siglec<sup>+</sup>CD11c-CD45<sup>+</sup>) cell numbers, and BAL IL-5 and IL-13 were measured on days 3 and 6 post-infection. Data representative of 3 repeat experiments.
- (D) Recombinant IL-33 was intraperitoneally injected with HpARI or HpARI<sub>CCP1/2</sub>, and proportions of Ly6G+CD11b+ neutrophils in the CD45<sup>+</sup> peritoneal lavage population assessed 3 h post-injection. Representative FACS plots shown of CD45<sup>+</sup> live cells. Data representative of 2 repeat experiments.

227 Finally, we utilised a model of recombinant IL-33 intraperitoneal injection, which induces a mast  
228 cell-dependent neutrophilia (Enoksson et al., 2013), in contrast to the ILC2-dependent, largely  
229 eosinophilic response seen on IL-33 release in the lung. Again, here we found that while HpARI  
230 suppressed IL-33 induced neutrophilia, HpARI\_CCP1/2 exacerbated it (Figure 1D).

231 In conclusion, HpARI\_CCP1/2 amplifies IL-33-dependent responses *in vivo*. We hypothesised that  
232 this activity was due to stabilisation of the cytokine, increasing its effective half-life. To test this  
233 hypothesis, we developed an *in vitro* model of IL-33 release and IL-33 responses.

234

235 *HpARI\_CCP1/2 maintains IL-33 in its active form.*

236 The CMT-64 cell line constitutively produces IL-33, which is released on cellular necrosis (Scott et  
237 al., 2018). Confluent CMT-64 cells were washed into PBS+0.1% BSA, and necrosis induced by  
238 addition of 0.1% Triton X100, in the presence or absence of HpARI or HpARI\_CCP1/2. Over a 24 h  
239 timecourse following Triton addition, we assessed IL-33 release by ELISA and western blot. IL-33  
240 ELISA showed that Triton X100 caused rapid IL-33 release, with high concentrations of the cytokine  
241 detected in culture supernatants within 15 min of Triton addition in control wells. IL-33 levels then  
242 gradually decreased at later timepoints, presumably as the protein was degraded (Figure 3A)(Scott et  
243 al., 2018). HpARI addition ablated the IL-33 signal seen in the ELISA, as shown in our previous  
244 study (Osborn et al., 2017): as well as retarding the release of the cytokine, HpARI binding also out-  
245 competes the ELISA antibodies, abolishing detection of IL-33. HpARI\_CCP1/2 did not abolish  
246 detection of IL-33 in the ELISA, but did reduce the IL-33 signal at early timepoints. Moreover, in the  
247 presence of HpARI\_CCP1/2, IL-33 accumulated over the timecourse and maintained high levels at  
248 later timepoints.

249 In contrast, when IL-33 in the same samples was assessed by western blot, a very strong signal was  
250 seen at all timepoints at a size consistent with full-length IL-33 protein (~30 kDa), while a weaker  
251 signal was seen at around 18-20 kDa, consistent with processed mature IL-33 (Figure 3B and  
252 Supplementary Figure 1). While a strong full-length IL-33 band was seen across all timepoints and  
253 treatments, the density of the mature bands were dynamically altered by the presence of each  
254 treatment: in control wells, mature IL-33 was present early after Triton-X100 treatment and was  
255 degraded at later timepoints, but in the presence of HpARI\_CCP1/2, the mature form was present at  
256 lower intensities than in control wells at early timepoints, but accumulated over the timecourse and  
257 was strongest at 24 h post triton treatment, reflecting ELISA data (Figure 3A). HpARI treatment had  
258 a similar effect to HpARI\_CCP1/2 when IL-33 was assessed by western blot. The difference in IL-33  
259 signal strength between ELISA and western blot in the presence of HpARI was seen in a previous  
260 study (Osborn et al., 2017), and is thought to be due to interference with antibody binding to the  
261 endogenous IL-33-HpARI complex in ELISA, but in a denaturing western blot, proteins from this  
262 complex are dissociated and available for antibody detection. Together, this data suggests that  
263 binding of IL-33 by HpARI or HpARI\_CCP1/2 stabilises the mature cytokine, protecting it from  
264 degradation.

265 To assess the activity of the cytokine released, we induced necrosis of CMT-64 cells via freeze-thaw  
266 treatment. This treatment could be carried out in complete culture medium (without toxic additives  
267 such as Triton-X100), allowing downstream assessment of cellular responses to the released  
268 cytokine. On thaw, necrotic CMT-64 cells were incubated for up to 48 h at 37°C, and IL-33 levels in  
269 supernatants assessed by ELISA. Similarly to Triton X100-mediated necrosis, we found high levels

# Fig 3

bioRxiv preprint doi: <https://doi.org/10.1101/2020.04.13.035477>; this version posted April 13, 2020. The copyright holder for this preprint (which was not certified by peer review) is the author/funder, who has granted bioRxiv a license to display the preprint in perpetuity. It is made available under aCC-BY-NC 4.0 International license.

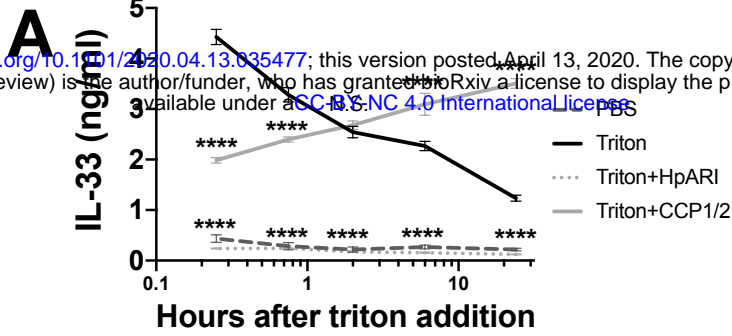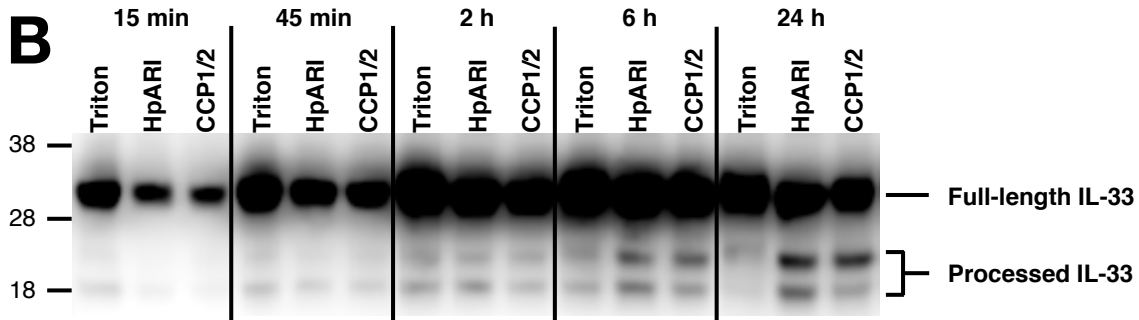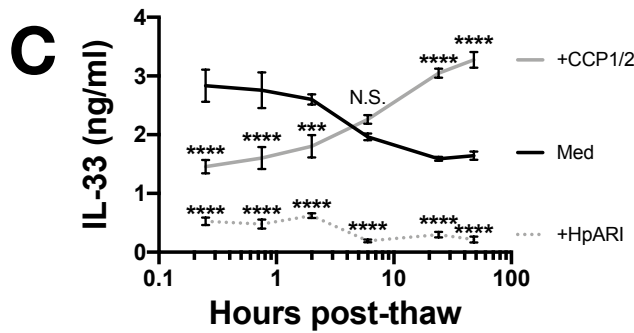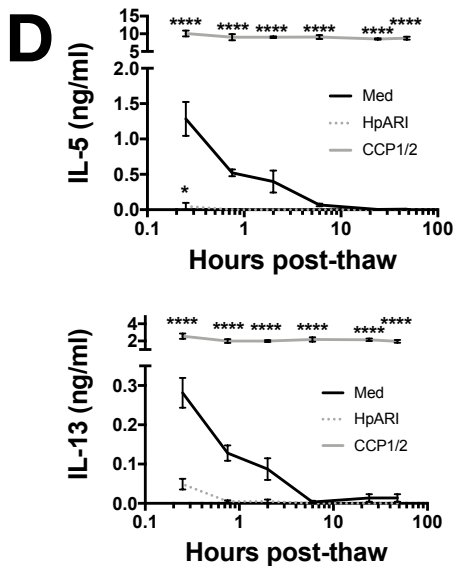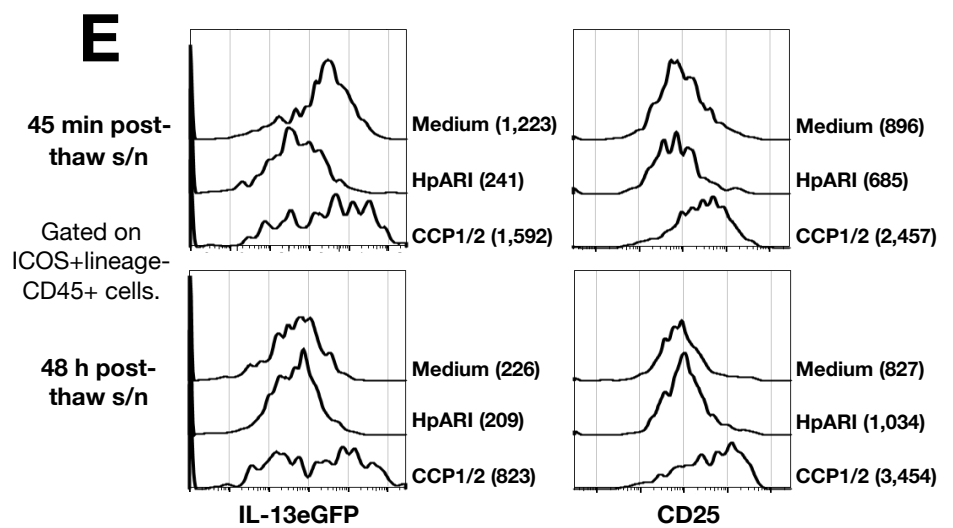

**Figure 3:**  
**(A)** CMT-64 cells were cultured to confluency, and treated with 0.1% Triton X100+0.1% BSA alone, or in the presence of HpARI or HpARI\_CCP1/2 (CCP1/2). Supernatants were harvested over a timecourse and IL-33 levels assessed by ELISA. Each measurement contains 4 technical replicates and is representative of 3 repeat experiments.  
**(B)** IL-33 Western blot of pooled samples from (A). Representative of 3 repeat experiments.  
**(C)** CMT-64 cells were cultured to confluency in RPMI+10% FCS, and freeze-thawed in the presence of complete medium (Med), HpARI or HpARI\_CCP1/2. After thaw, cultures of necrotic cells were incubated at 37C, and supernatants taken over a timecourse, and assessed for IL-33 levels by ELISA. Each timepoint shows 4 technical replicates.  
**(D)** Supernatants from (C) were applied to IL-13eGFP<sup>±</sup> bone marrow cells in the presence of IL-2 and IL-7, and cultured for 5 days. Levels of IL-5 (upper panel) and IL-13 (lower panel) in supernatants were assessed by ELISA. Each timepoint shows 4 technical replicates.  
**(E)** Bone marrow cells from (D) after 5 days of culture were pooled, stained, and gated on ICOS<sup>+</sup>lineage-CD45<sup>+</sup> ILC2s, and assessed for IL-13eGFP and CD25 expression. Numbers in parentheses indicate geometric mean fluorescent intensity for each condition. All data from C-E is representative of 3 repeat experiments.

270 of IL-33 released rapidly after freeze-thaw necrosis, which gradually decreased over the 48 h  
271 timecourse in control wells, while IL-33 levels increased over the timecourse in the presence of  
272 HpARI\_CCP1/2 (Figure 3C). These supernatants were applied to bone marrow cells from IL-13<sup>+eGFP</sup>  
273 reporter mice (Neill et al., 2010) cultured in the presence of IL-2 and IL-7 (to support ILC2  
274 differentiation), and ILC2 responses assessed 5 days later. As shown in Figure 3D, control freeze-  
275 thaw CMT-64 supernatants could only induce bone marrow cell IL-5 and IL-13 production at early  
276 timepoints post-thaw, implying that after ~6 h post-thaw, all IL-33 present in the culture medium was  
277 inactive. This response appeared IL-33-dependent as HpARI entirely inhibited IL-5 and IL-13  
278 release. In contrast, supernatants from cells freeze-thawed in the presence of HpARI\_CCP1/2 were  
279 able to maintain high levels of IL-5 and IL-13 stimulation (approximately 10-fold higher than the  
280 peak production seen in control wells) and this stimulation was maintained even when supernatants  
281 had been incubated for 48 h post-thaw. Finally, flow cytometry for IL-13eGFP reporter or CD25  
282 expression was used to confirm that ILC2s were activated by supernatants from medium of freeze-  
283 thaw control wells at early (45 min post-thaw), but not late (48 h post-thaw) timepoints, while wells  
284 containing HpARI\_CCP1/2 remained highly activated throughout the timecourse (Figure 3E and  
285 Supplementary Figure 3).

## 286 5. Discussion

287 HpARI blocks IL-33 responses and is secreted by *H. polygyrus*, as part of a suite of  
288 immunomodulatory effector molecules which act to prevent immune-mediated ejection of the  
289 parasite (Maizels, Smits, & McSorley, 2018). HpARI acts by binding to IL-33 (through the HpARI  
290 CCP2 domain) and to genomic DNA in necrotic cells (through the HpARI CCP1 domain), tethering  
291 the cytokine within the necrotic cell nucleus and preventing its release (Osborn et al., 2017). Here,  
292 we further characterise these interactions, showing that a synthetic, non-natural construct lacking the  
293 CCP3 domain (HpARI\_CCP1/2) binds IL-33 with an approximately 10-fold lower affinity than the  
294 full-length HpARI protein, and lacks the blocking activity of HpARI against IL-33-ST2 interactions.  
295 Furthermore, HpARI\_CCP1/2 had the surprising effect of stabilising and amplifying IL-33 responses  
296 *in vitro* and *in vivo*.

297 IL-33 is known to mediate parasite expulsion in a type-2 dependent-manner (Hung et al., 2013; Zaiss  
298 et al., 2013). The HpARI\_CCP1/2 truncated protein maintains the activity of IL-33, potentially  
299 amplifying its anti-parasitic effects. It is worthwhile emphasising that this truncated construct is not a  
300 protein naturally secreted by the parasite, but rather a synthetic product with an unexpected activity.

301 As the IL-33 pathway is strongly implicated in human asthma, HpARI, with its unique mechanism of  
302 action and strong binding to IL-33, is a potential therapeutic agent. IL-33 is a potent inflammatory  
303 cytokine which is kept tightly regulated. Once released, IL-33 undergoes rapid oxidation and  
304 degradation, confining its effects to a short time after release (Cohen et al., 2015; Scott et al., 2018).  
305 Addition of HpARI or HpARI\_CCP1/2 prevented degradation of the cytokine and maintained it in its  
306 active form, possibly due to steric hinderance of proteases. As HpARI also blocked the interaction of  
307 IL-33 with its receptor, there was no cellular response to IL-33 in the presence of HpARI, while  
308 HpARI\_CCP1/2, which lacks this IL-33-ST2 blocking activity, was unable to inhibit responses to IL-  
309 33. Furthermore, most surprisingly, HpARI\_CCP1/2 was able to maintain the effects of IL-33 over a  
310 long time-course, potentially exacerbating IL-33-dependent responses *in vivo* and *in vitro*.

311 The effects of HpARI\_CCP1/2 may not be confined to extending the half-life of IL-33 by preventing  
312 its degradation, but may prevent the much more rapid oxidation of the cytokine. Partial oxidation of  
313 IL-33 occurs *in vivo* within 15 min of release (Cohen et al., 2015), therefore the activity of released  
314 IL-33 *in vivo* may be less than that of fully active IL-33. Indeed, when a purified wild-type or an  
315 oxidation-resistant mutant of human IL-33 were tested *in vitro*, the mutant form of IL-33 was found  
316 to be 30-fold more potent than WT IL-33 (Cohen et al., 2015). In this study, we were not able to  
317 measure the difference between reduced and oxidised IL-33, therefore we cannot make definitive  
318 statements about this activity of HpARI\_CCP1/2. However, inhibition of IL-33 inactivation, either  
319 through prevention of oxidation or proteolytic degradation, could be a potent method for amplifying  
320 IL-33-dependent responses.

321 Although IL-33 is strongly implicated in inducing eosinophilic inflammation in anti-parasite or  
322 allergic type 2 immune responses (Filbey et al., 2019; Liew, Girard, & Turnquist, 2016), the cytokine  
323 has also shown protective effects in models of colitis (Lopetuso et al., 2018), graft-versus-host  
324 disease (Zhang et al., 2015), autoimmunity (Jiang et al., 2012), obesity (Mahlakoiv et al., 2019),  
325 wound healing and tissue restoration (Monticelli et al., 2011; Rak et al., 2016). Therefore, treatments  
326 which amplify endogenous IL-33 responses could have clinical potential in a range of treatments.

327 HpARI\_CCP1/2 could also be a useful tool for IL-33 research. Modulating IL-33 responses by using  
328 HpARI and HpARI\_CCP1/2 in parallel allows assessment of the role of IL-33 in a system in the

329 absence of potentially confounding effects of recombinant cytokine administration or genetic  
330 manipulation. In addition, the strategy of IL-33 stabilisation by HpARI\_CCP1/2 may be able to be  
331 replicated using a monoclonal antibody-based therapy, with low-affinity or non-blocking antibodies  
332 potentially able to amplify IL-33 responses. As anti-IL-33 treatments enter clinical trials (Chen et al.,  
333 2019), this is an important consideration, as sub-optimal antibodies could result in amplification  
334 rather than suppression of IL-33 responses.

335 This study sheds further light on the mechanism of binding of HpARI to IL-33, the function of the  
336 domains of HpARI, and the effects of IL-33 degradation and inactivation. Further structural  
337 characterisation of HpARI–IL-33 binding will be useful in characterising this interaction and could  
338 allow guided design of more effective IL-33-blocking or IL-33-amplifying therapeutic agents.

339

340 **Acknowledgements**

341 Flow cytometry data was generated with support from the QMRI Flow Cytometry and cell sorting  
342 facility, University of Edinburgh.

343

344 **Conflict of Interest**

345 The authors declare that the research was conducted in the absence of any commercial or financial  
346 relationships that could be construed as a potential conflict of interest.

347

348 **Author Contributions**

349 CC, FV, MW and HM designed and planned experiments. CC, FV, SC, JR, WG, AO, MW and HM  
350 undertook experiments. MW provided guidance on the design of the SPR experiments and carried  
351 these out. HM supervised all work and wrote the paper.

352

353 **Funding**

354 This work was funded by awards to HM from LONGFONDS | Accelerate as part of the AWWA  
355 project and the Medical Research Council (MR/S000593/1).

356

357

## 358 References

- 359 Bartemes, K. R., Iijima, K., Kobayashi, T., Kephart, G. M., McKenzie, A. N., & Kita, H. (2012). IL-  
360 33-responsive lineage- CD25+ CD44(hi) lymphoid cells mediate innate type 2 immunity and  
361 allergic inflammation in the lungs. *J Immunol*, *188*(3), 1503-1513.  
362 doi:10.4049/jimmunol.1102832
- 363 Buck, A. H., Coakley, G., Simbari, F., McSorley, H. J., Quintana, J. F., Le Bihan, T., . . . Maizels, R.  
364 M. (2014). Exosomes secreted by nematode parasites transfer small RNAs to mammalian  
365 cells and modulate innate immunity. *Nat Commun*, *5*, 5488. doi:10.1038/ncomms6488
- 366 Cayrol, C., Duval, A., Schmitt, P., Roga, S., Camus, M., Stella, A., . . . Girard, J. P. (2018).  
367 Environmental allergens induce allergic inflammation through proteolytic maturation of IL-  
368 33. *Nat Immunol*, *19*(4), 375-385. doi:10.1038/s41590-018-0067-5
- 369 Chen, Y. L., Gutowska-Owsiak, D., Hardman, C. S., Westmoreland, M., MacKenzie, T., Cifuentes,  
370 L., . . . Ogg, G. (2019). Proof-of-concept clinical trial of etokimab shows a key role for IL-33  
371 in atopic dermatitis pathogenesis. *Sci Transl Med*, *11*(515). doi:10.1126/scitranslmed.aax2945
- 372 Cohen, E. S., Scott, I. C., Majithiya, J. B., Rapley, L., Kemp, B. P., England, E., . . . Mustelin, T.  
373 (2015). Oxidation of the alarmin IL-33 regulates ST2-dependent inflammation. *Nat Commun*,  
374 *6*, 8327. doi:10.1038/ncomms9327
- 375 Doherty, T. A., Khorram, N., Chang, J. E., Kim, H. K., Rosenthal, P., Croft, M., & Broide, D. H.  
376 (2012). STAT6 regulates natural helper cell proliferation during lung inflammation initiated  
377 by *Alternaria*. *Am J Physiol Lung Cell Mol Physiol*, *303*(7), L577-588.  
378 doi:10.1152/ajplung.00174.2012
- 379 Enoksson, M., Moller-Westerberg, C., Wicher, G., Fallon, P. G., Forsberg-Nilsson, K., Lunderius-  
380 Andersson, C., & Nilsson, G. (2013). Intraperitoneal influx of neutrophils in response to IL-  
381 33 is mast cell-dependent. *Blood*, *121*(3), 530-536. doi:10.1182/blood-2012-05-434209
- 382 Filbey, K. J., Camberis, M., Chandler, J., Turner, R., Kettle, A. J., Eichenberger, R. M., . . . Le Gros,  
383 G. (2019). Intestinal helminth infection promotes IL-5- and CD4(+) T cell-dependent  
384 immunity in the lung against migrating parasites. *Mucosal Immunol*, *12*(2), 352-362.  
385 doi:10.1038/s41385-018-0102-8
- 386 Harris, N. L., & Loke, P. (2017). Recent Advances in Type-2-Cell-Mediated Immunity: Insights from  
387 Helminth Infection. *Immunity*, *47*(6), 1024-1036. doi:10.1016/j.immuni.2017.11.015
- 388 Hung, L. Y., Lewkowich, I. P., Dawson, L. A., Downey, J., Yang, Y., Smith, D. E., & Herbert, D. R.  
389 (2013). IL-33 drives biphasic IL-13 production for noncanonical Type 2 immunity against  
390 hookworms. *Proc Natl Acad Sci U S A*, *110*(1), 282-287. doi:10.1073/pnas.1206587110
- 391 Jiang, H. R., Milovanovic, M., Allan, D., Niedbala, W., Besnard, A. G., Fukada, S. Y., . . . Liew, F.  
392 Y. (2012). IL-33 attenuates EAE by suppressing IL-17 and IFN-gamma production and  
393 inducing alternatively activated macrophages. *Eur J Immunol*, *42*(7), 1804-1814.  
394 doi:10.1002/eji.201141947
- 395 Johansson, K., & McSorley, H. J. (2019). Interleukin-33 in the developing lung-Roles in asthma and  
396 infection. *Pediatr Allergy Immunol*, *30*(5), 503-510. doi:10.1111/pai.13040
- 397 Johnston, C. J., Robertson, E., Harcus, Y., Grainger, J. R., Coakley, G., Smyth, D. J., . . . Maizels, R.  
398 (2015). Cultivation of *Heligmosomoides polygyrus*: an immunomodulatory nematode parasite  
399 and its secreted products. *J Vis Exp*(98), e52412. doi:10.3791/52412



- 400 Johnston, C. J., Smyth, D. J., Kodali, R. B., White, M. P. J., Harcus, Y., Filbey, K. J., . . . Maizels, R.  
401 M. (2017). A structurally distinct TGF-beta mimic from an intestinal helminth parasite  
402 potently induces regulatory T cells. *Nat Commun*, 8(1), 1741. doi:10.1038/s41467-017-  
403 01886-6
- 404 Lawrence, R. A., Gray, C. A., Osborne, J., & Maizels, R. M. (1996). Nippostrongylus brasiliensis:  
405 cytokine responses and nematode expulsion in normal and IL-4-deficient mice. *Exp Parasitol*,  
406 84(1), 65-73. doi:10.1006/expr.1996.0090
- 407 Lefrancais, E., Roga, S., Gautier, V., Gonzalez-de-Peredo, A., Monsarrat, B., Girard, J. P., & Cayrol,  
408 C. (2012). IL-33 is processed into mature bioactive forms by neutrophil elastase and  
409 cathepsin G. *Proc Natl Acad Sci U S A*, 109(5), 1673-1678. doi:10.1073/pnas.1115884109
- 410 Liew, F. Y., Girard, J. P., & Turnquist, H. R. (2016). Interleukin-33 in health and disease. *Nat Rev*  
411 *Immunol*, 16(11), 676-689. doi:10.1038/nri.2016.95
- 412 Lopetuso, L. R., De Salvo, C., Pastorelli, L., Rana, N., Senkfor, H. N., Petito, V., . . . Pizarro, T. T.  
413 (2018). IL-33 promotes recovery from acute colitis by inducing miR-320 to stimulate  
414 epithelial restitution and repair. *Proc Natl Acad Sci U S A*, 115(40), E9362-E9370.  
415 doi:10.1073/pnas.1803613115
- 416 Mahlakoiv, T., Flamar, A. L., Johnston, L. K., Moriyama, S., Putzel, G. G., Bryce, P. J., & Artis, D.  
417 (2019). Stromal cells maintain immune cell homeostasis in adipose tissue via production of  
418 interleukin-33. *Sci Immunol*, 4(35). doi:10.1126/sciimmunol.aax0416
- 419 Maizels, R. M., Smits, H. H., & McSorley, H. J. (2018). Modulation of Host Immunity by Helminths:  
420 The Expanding Repertoire of Parasite Effector Molecules. *Immunity*, 49(5), 801-818.  
421 doi:10.1016/j.immuni.2018.10.016
- 422 McSorley, H. J., Blair, N. F., Smith, K. A., McKenzie, A. N., & Maizels, R. M. (2014). Blockade of  
423 IL-33 release and suppression of type 2 innate lymphoid cell responses by helminth secreted  
424 products in airway allergy. *Mucosal Immunol*, 7(5), 1068-1078. doi:10.1038/mi.2013.123
- 425 Monticelli, L. A., Sonnenberg, G. F., Abt, M. C., Alenghat, T., Ziegler, C. G., Doering, T. A., . . .  
426 Artis, D. (2011). Innate lymphoid cells promote lung-tissue homeostasis after infection with  
427 influenza virus. *Nat Immunol*, 12(11), 1045-1054. doi:10.1031/ni.2131
- 428 Neill, D. R., Wong, S. H., Bellosi, A., Flynn, R. J., Daly, M., Langford, T. K., . . . McKenzie, A. N.  
429 (2010). Nuocytes represent a new innate effector leukocyte that mediates type-2 immunity.  
430 *Nature*, 464(7293), 1367-1370. doi:10.1038/nature08900
- 431 Osbourn, M., Soares, D. C., Vacca, F., Cohen, E. S., Scott, I. C., Gregory, W. F., . . . McSorley, H. J.  
432 (2017). HpARI Protein Secreted by a Helminth Parasite Suppresses Interleukin-33. *Immunity*,  
433 47(4), 739-751 e735. doi:10.1016/j.immuni.2017.09.015
- 434 Rak, G. D., Osborne, L. C., Siracusa, M. C., Kim, B. S., Wang, K., Bayat, A., . . . Volk, S. W.  
435 (2016). IL-33-Dependent Group 2 Innate Lymphoid Cells Promote Cutaneous Wound  
436 Healing. *J Invest Dermatol*, 136(2), 487-496. doi:10.1038/JID.2015.406
- 437 Reynolds, L. A., Filbey, K. J., & Maizels, R. M. (2012). Immunity to the model intestinal helminth  
438 parasite *Heligmosomoides polygyrus*. *Semin Immunopathol*, 34(6), 829-846.  
439 doi:10.1007/s00281-012-0347-3
- 440 Scott, I. C., Majithiya, J. B., Sanden, C., Thornton, P., Sanders, P. N., Moore, T., . . . Cohen, E. S.  
441 (2018). Interleukin-33 is activated by allergen- and necrosis-associated proteolytic activities

- 442 to regulate its alarmin activity during epithelial damage. *Sci Rep*, 8(1), 3363.  
443 doi:10.1038/s41598-018-21589-2
- 444 Shimokawa, C., Kanaya, T., Hachisuka, M., Ishiwata, K., Hisaeda, H., Kurashima, Y., . . . Ohno, H.  
445 (2017). Mast Cells Are Crucial for Induction of Group 2 Innate Lymphoid Cells and  
446 Clearance of Helminth Infections. *Immunity*, 46(5), 863-874 e864.  
447 doi:10.1016/j.immuni.2017.04.017
- 448 Wear, M. A., & Walkinshaw, M. D. (2006). Thermodynamics of the cyclophilin-A/cyclosporin-A  
449 interaction: a direct comparison of parameters determined by surface plasmon resonance  
450 using Biacore T100 and isothermal titration calorimetry. *Anal Biochem*, 359(2), 285-287.
- 451 Wills-Karp, M., Rani, R., Dienger, K., Lewkowich, I., Fox, J. G., Perkins, C., . . . Herbert, D. R.  
452 (2012). Trefoil factor 2 rapidly induces interleukin 33 to promote type 2 immunity during  
453 allergic asthma and hookworm infection. *J Exp Med*, 209(3), 607-622.  
454 doi:10.1084/jem.20110079
- 455 Zhang, J., Ramadan, A. M., Griesenauer, B., Li, W., Turner, M. J., Liu, C., . . . Paczesny, S. (2015).  
456 ST2 blockade reduces sST2-producing T cells while maintaining protective mST2-expressing  
457 T cells during graft-versus-host disease. *Sci Transl Med*, 7(308), 308ra160.  
458 doi:10.1126/scitranslmed.aab0166
- 459
- 460

461 **Figure Legends:**

462 **Figure 1:**

- 463 (A) Surface plasmon resonance measurements of IL-33 binding to chip-bound HpARI,  
464 HpARI\_CCP1/2 and HpARI\_CCP2/3.  
465 (B) ST2-Fc was bound to protein G-coated magnetic beads and used to immunoprecipitate murine  
466 IL-33 (mIL-33). IL-33 western blot of eluted material shown. Image representative of two  
467 independent experiments.

468

469 **Figure 2:**

- 470 (A) HpARI or HpARI\_CCP1/2 (CCP1/2) were coadministered with *Alternaria* and OVA by the  
471 intranasal route, then the OVA-specific response recalled 2 weeks later. BAL and lung  
472 eosinophil (Siglecf+CD11c-CD45+) and ILC2 (ICOS+lineage-CD45+) cell numbers shown.  
473 Data pooled from 2 repeat experiments.
- 474 (B) HpARI\_CCP1/2 (CCP1/2) was coadministered with *Alternaria* allergen by the intranasal  
475 route. After 24 h, BAL eosinophil (Siglecf+CD11c-CD45+) and neutrophil  
476 (Ly6G+CD11b+Siglecf-CD11c-CD45+) numbers, and lung ILC2 CD25 geometric mean  
477 fluorescent intensity were assessed by flow cytometry. Data representative of 2 repeat  
478 experiments.
- 479 (C) HpARI or HpARI\_CCP1/2 were intranasally administered on days 0, 1 and 2 after infection  
480 with *Nippostrongylus brasiliensis*. BAL eosinophil (Siglecf+CD11c-CD45+) cell numbers,  
481 and BAL IL-5 and IL-13 were measured on days 3 and 6 post-infection. Data representative  
482 of 3 repeat experiments.
- 483 (D) Recombinant IL-33 was intraperitoneally injected with HpARI or HpARI\_CCP1/2, and  
484 proportions of Ly6G+CD11b+ neutrophils in the CD45+ peritoneal lavage population  
485 assessed 3 h post-injection. Representative FACS plots shown of CD45+ live cells. Data  
486 representative of 2 repeat experiments.

487

488

489 **Figure 3:**

- 490 (A) CMT-64 cells were cultured to confluency, and treated with 0.1% Triton X100+0.1% BSA  
491 alone, or in the presence of HpARI or HpARI\_CCP1/2 (CCP1/2). Supernatants were  
492 harvested over a timecourse and IL-33 levels assessed by ELISA. Each measurement contains  
493 4 technical replicates and is representative of 3 repeat experiments.
- 494 (B) IL-33 Western blot of pooled samples from (A). Representative of 3 repeat experiments.
- 495 (C) CMT-64 cells were cultured to confluency in RPMI+10% FCS, and freeze-thawed in the  
496 presence of complete medium (Med), HpARI or HpARI\_CCP1/2. After thaw, cultures of

- 497 necrotic cells were incubated at 37C, and supernatants taken over a timecourse, and assessed  
498 for IL-33 levels by ELISA. Each timepoint shows 4 technical replicates.
- 499 (D) Supernatants from (C) were applied to IL-13eGFP+/- bone marrow cells in the presence of  
500 IL-2 and IL-7, and cultured for 5 days. Levels of IL-5 (upper panel) and IL-13 (lower panel)  
501 in supernatants were assessed by ELISA. Each timepoint shows 4 technical replicates.
- 502 (E) Bone marrow cells from (D) after 5 days of culture were pooled, stained, and gated on  
503 ICOS+lineage-CD45+ ILC2s, and assessed for IL-13eGFP and CD25 expression. Numbers in  
504 parentheses indicate geometric mean fluorescent intensity for each condition. All data from  
505 C-E is representative of 3 repeat experiments.
- 506

# Supp Fig 1

bioRxiv preprint doi: <https://doi.org/10.1101/2020.04.13.035477>; this version posted April 13, 2020. The copyright holder for this preprint (which was not certified by peer review) is the author/funder, who has granted bioRxiv a license to display the preprint in perpetuity. It is made available under aCC-BY-NC 4.0 International license.

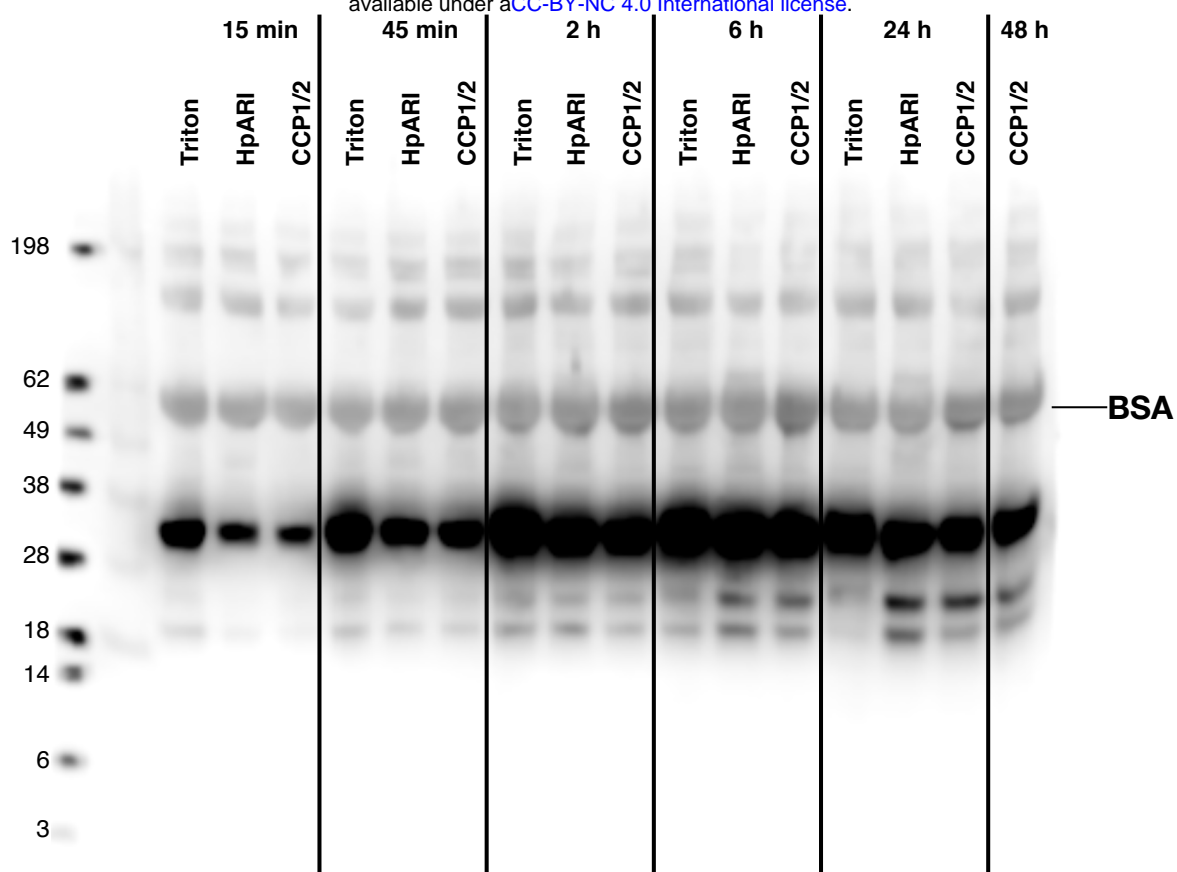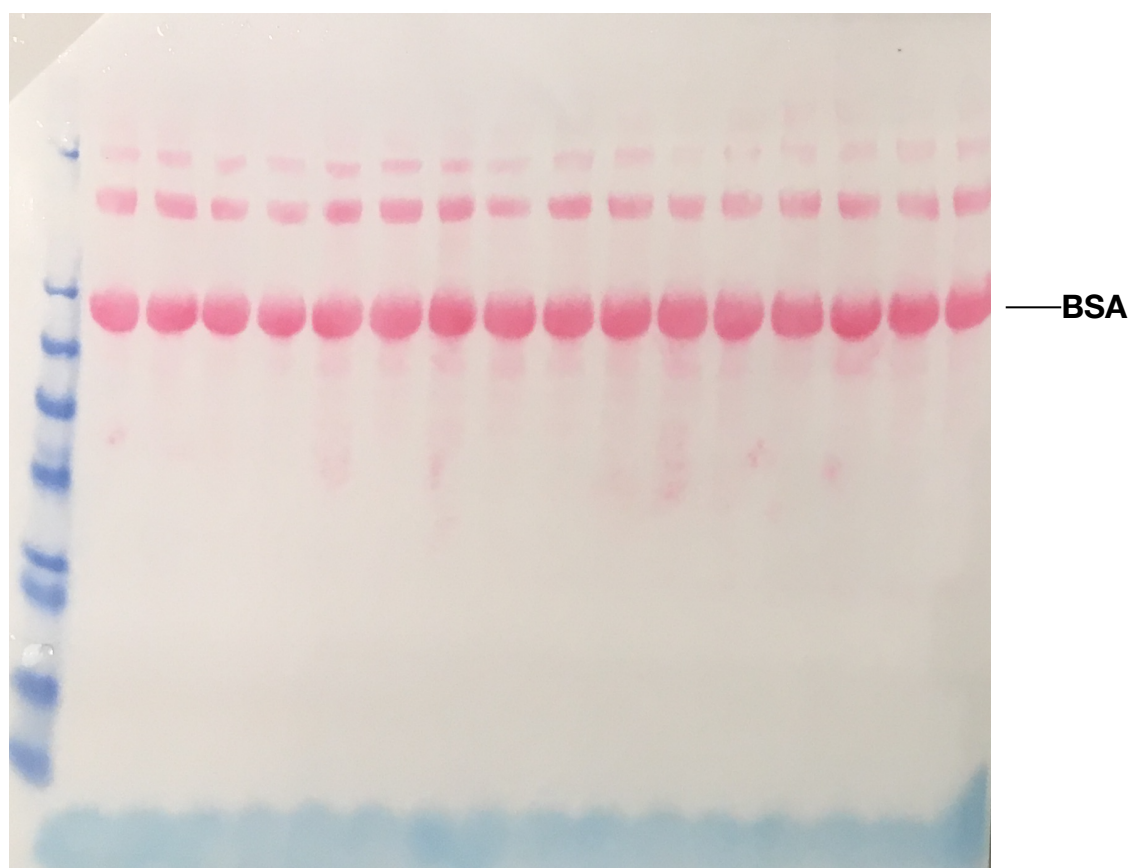

## Supplementary Figure 1:

(A) Uncropped western blot shown in Figure 3B.

(B) Ponceau stain of blot shown in (A)

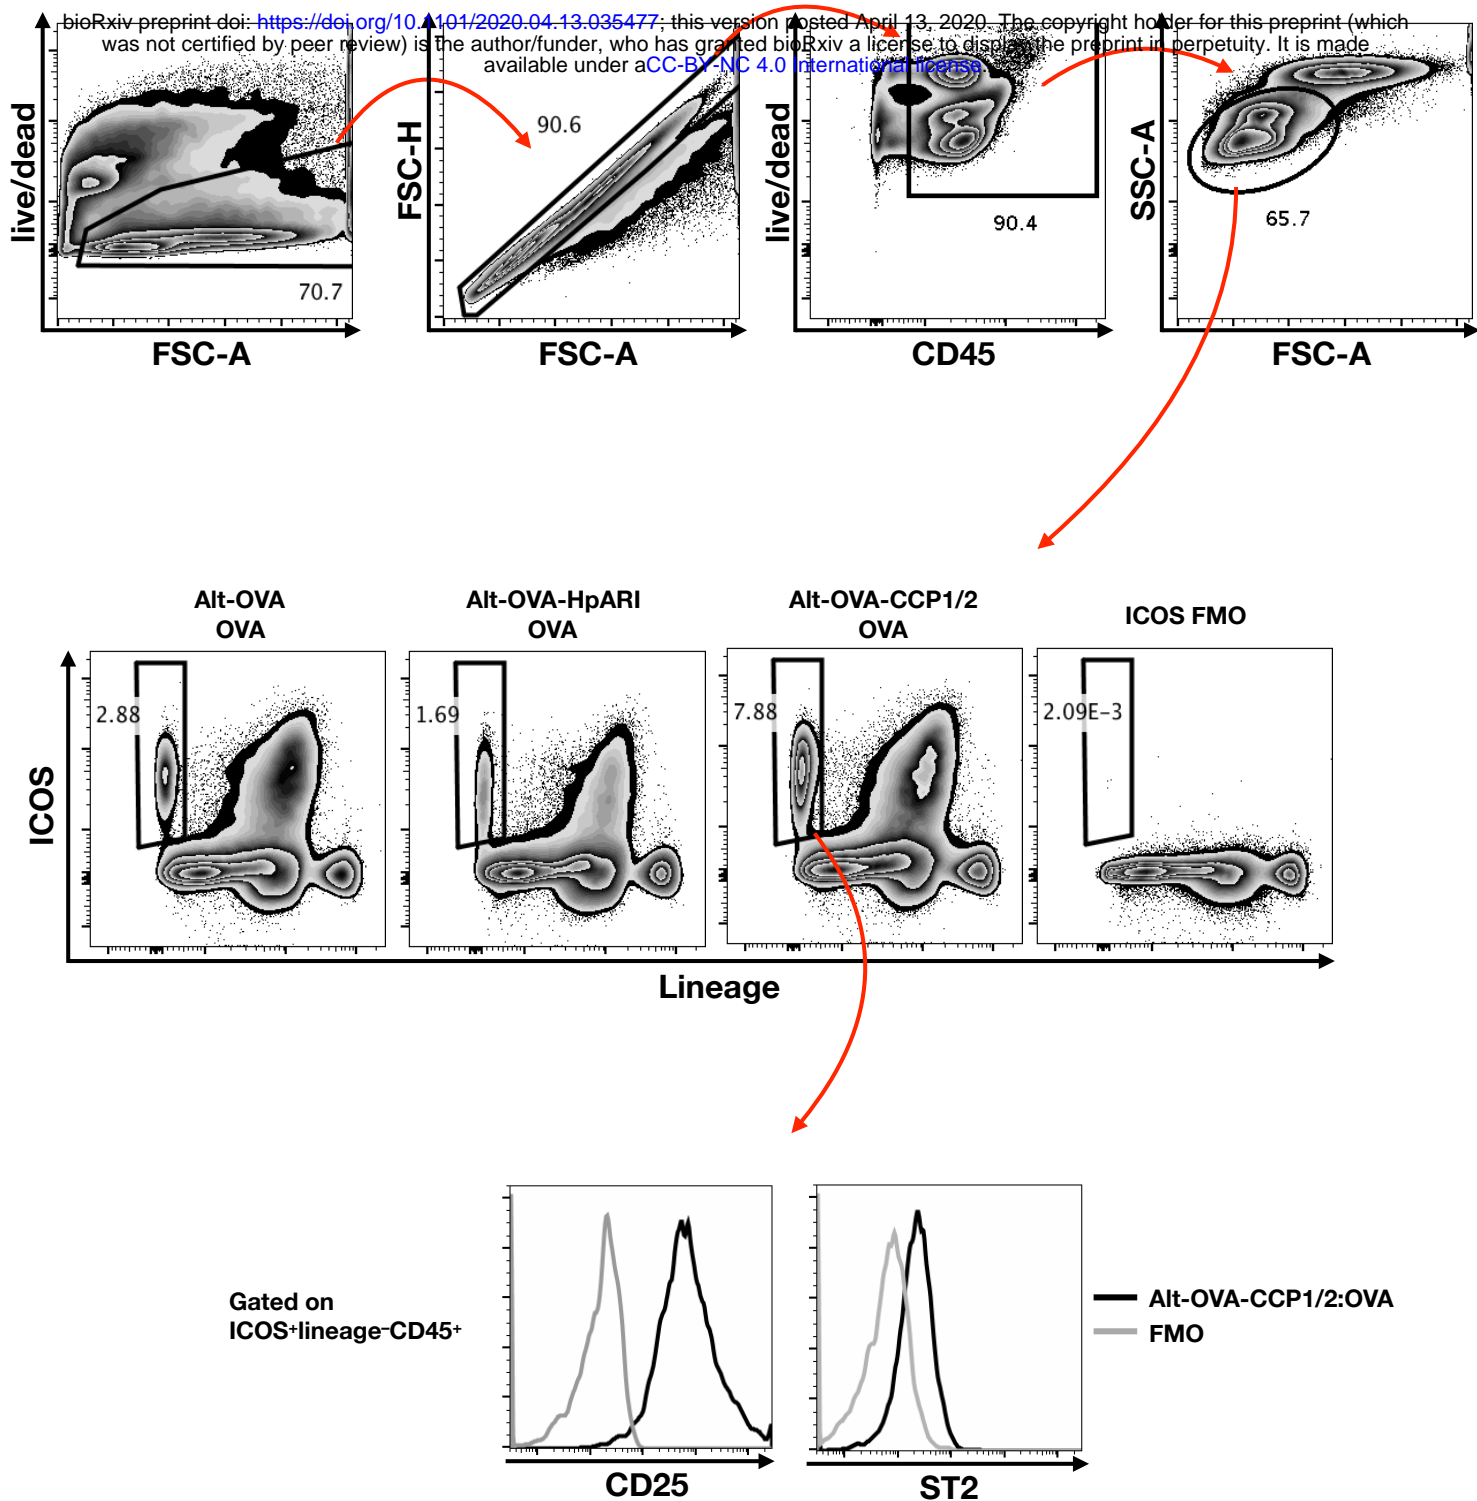

**Supplementary Figure 2:**

Gating strategy and FMO controls for lung innate lymphoid cell staining, from samples described in Figure 2A.

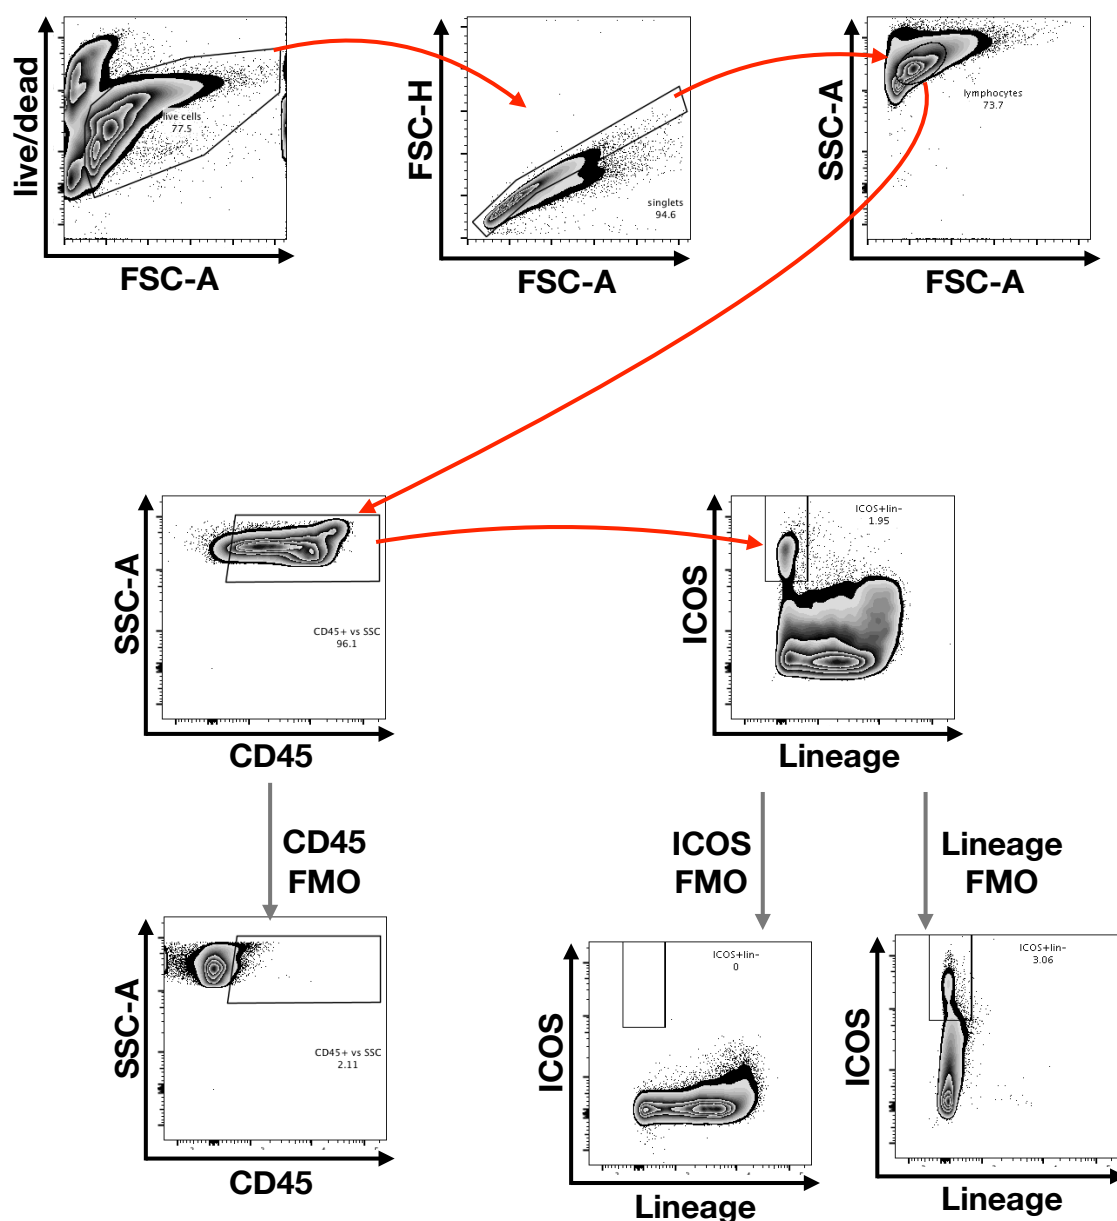

**Supplementary Figure 3:**

Gating strategy and FMO controls for ICOS+lineage-CD45+ ILC2s shown in Figure 3E
